# Supplementary material for: A Prototype Skin Substitute, Made of Recycled Marine Collagen, Improves the Skin Regeneration of Sheep
Source: MDPI journal article supplement (doi:10.3390/ani11051219), 2021-04-23
Supplement: s1 [file s1]

**Table S1.** List of primer sequences used for the gene expression analysis (RT-PCR).

| Gene                                                | Sequence<br>(5' → 3')                                          | Accession number |
|-----------------------------------------------------|----------------------------------------------------------------|------------------|
| 18S                                                 | F: AAACGGCTACCACATCCAAG<br>R: TCCTGTATTGTTATTTTCGTCAC          | XR_003587981.1   |
| Ribosomal protein S24<br>(RPS24)                    | F: TTTGCCAGCACCAACGTTG<br>R: AAGGAACGCAAGAACAGAATGAA           | XM_004021507.3   |
| Collagen 1 $\alpha$ 1<br>(Col1 $\alpha$ 1)          | F: GTACCATGACCGAGACGTGT<br>R: AGATCACGTCATCGCACAGCA            | XM_027974707.1   |
| Collagen 3 $\alpha$ 1<br>(Col3 $\alpha$ 1)          | F: TCTTCCAATAAACTGCGTTACATTC<br>R: CTAATTTCTTGCTTGACTGTTTCAGAA | XM_004004514.4   |
| Vascular endothelial<br>growth factor A<br>(VEGF-A) | F: GCTCTCTTGGGTGCATTGGA<br>R: TGCAGCCTGGGACCACTT               | NM_001025110.1   |
| hair Keratin<br>(hKER)                              | F: TGGTTCTGTGAGGGCTCCTT<br>R: GGCGCACCTTCTCCAGGTA              | NM_001199070.1   |
